# Supplementary material for: DNAJC14 Ameliorates Inner Ear Degeneration in the DFNB4 Mouse Model
Source: PubMed Central journal article supplement — Mol Ther Methods Clin Dev. 2019 Nov 30;17:188–97. doi: 10.1016/j.omtm.2019.11.019 (PMC6940655; doi:10.1016/j.omtm.2019.11.019), 2019-11-30
Supplement: mmc1.pdf [file mmc1.pdf]

**OMTM, Volume 17**

## **Supplemental Information**

### **DNAJC14 Ameliorates Inner Ear**

#### **Degeneration in the DFNB4 Mouse Model**

**Hye Ji Choi, Hyun Jae Lee, Jin Young Choi, Ik Hyun Jeon, Byunghwa Noh, Sushil Devkota, Han-Woong Lee, Seong Kug Eo, Jae Young Choi, Min Goo Lee, and Jinsei Jung**

**Supplementary Table S1. Antibodies used in this study.**

| <b>Name</b>                 | <b>Catalog number<br/>(Manufacturer)</b> | <b>Dilution (Use)</b>       |
|-----------------------------|------------------------------------------|-----------------------------|
| <b>Primary Antibody</b>     |                                          |                             |
| Pendrin                     | G-19 (Santa Cruz)                        | 1:1000 (WB)                 |
| Aldolase                    | N-15 (Santa Cruz)                        | 1:1000 (WB)                 |
| 3xHA-DNAJC14                | F-7 (Santa Cruz)                         | 1:1000 (WB)                 |
| Myc-Hsc70                   | 1B5 (Abcam)                              | 1:1000 (WB)                 |
| HA-Arf1                     | F-7 (Santa Cruz)                         | 1:1000 (WB)                 |
| anti-pendrin                | 2-hR2 (ABfrontier)                       | 1:1000 (WB)                 |
| anti- $\beta$ -Actin        | sc-47778 (Santa Cruz)                    | 1:2000 (WB)                 |
| anti-DNAJC14                | ab121535 (Abcam)                         | 1:1000 (WB), 1:200 (IF)     |
| anti-Flag                   | F3165 (Sigma)                            | 1:2000 (WB), 1:100 (IF)     |
| anti-DAPI                   | D1306 (Thermo)                           | 1:5000 (ICC), 1:10000 (IHC) |
| anti-KCNJ10                 | APC-035 (Alomone Labs)                   | 1:100 (IF)                  |
| <b>Secondary Antibody</b>   |                                          |                             |
| anti-mouse, HRP conjugated  | G-21040 (Thermo)                         | 1:1000 (WB)                 |
| anti-rabbit, HRP conjugated | 32460 (Thermo)                           | 1:1000 (WB)                 |
| Alexa 488, anti-mouse       | A11001 (Invitrogen)                      | 1:1000 (IF)                 |
| Alexa 488, anti-rabbit      | A11008 (Invitrogen)                      | 1:1000 (IF)                 |
| Alexa 568, anti-rabbit      | A11036 (Invitrogen)                      | 1:1000 (IF)                 |

IF, immunofluorescence; WB, western blotting; IHC, immunohistochemistry; ICC, immunocytochemistry

**Figure S1**

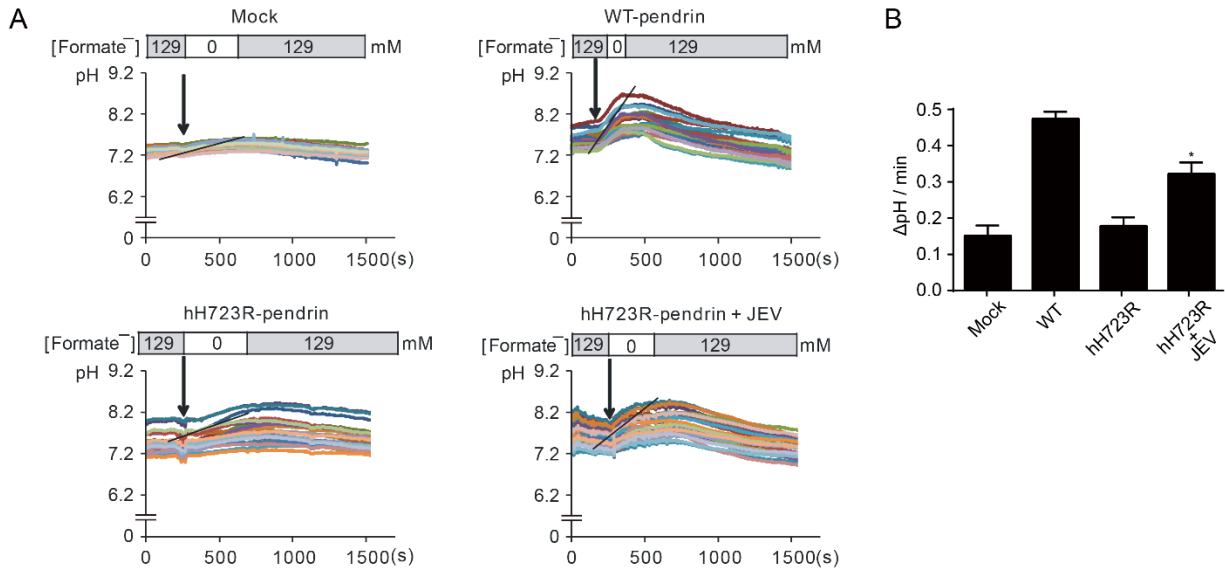

**Figure S1. HCO<sub>2</sub><sup>-</sup>/HCO<sub>3</sub><sup>-</sup> exchange activity by activation of DNAJC14.** (A) Formate/Bicarbonate (HCO<sub>2</sub><sup>-</sup>/HCO<sub>3</sub><sup>-</sup>) exchange activity was measured by recording the pH-sensitive fluorescent probe BCECF in PANC-1 mock cells, and in wild-type (WT)- and human H723R (hH723R)-pendrin stably expressing cells with/without Japanese encephalitis virus (JEV, 3x10<sup>6</sup> pfu) to activate DNAJC14, as detailed in the Methods. The quantification of multiple experiments is depicted in (B). The HCO<sub>2</sub><sup>-</sup>/HCO<sub>3</sub><sup>-</sup> exchange activity significantly increased in cells expressing hH723R-pendrin with JEV treatment (n = 4 in each group). \*, p < 0.05.

**Figure S2**

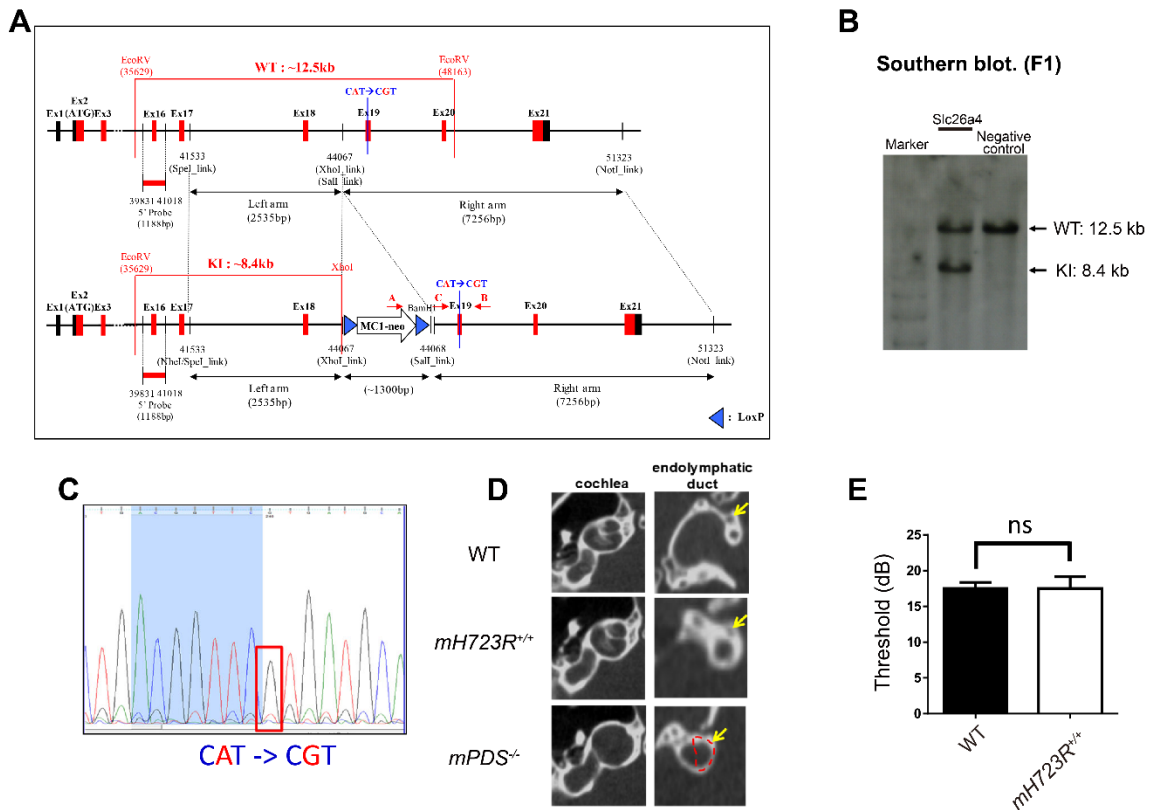

**Figure S2. Targeting scheme of the H723R knock-in mouse model.** (A) A Bac clone containing *slc26a4* genomic region was used to construct the targeting vector. The expected size of the restriction enzyme fragment of the wild-type (WT) and knock-in (KI) was ~12.5 kb and ~8.4 kb, respectively. The loxP-flanked neomycin resistance gene (neo) was used as a selection marker during embryonic stem (ES) cell culture. (B) The *slc26a4* knock-in (KI) was identified with Southern blotting. (C) Sanger sequencing of the target region revealed that the c.2168A>G point mutation was present in the founder mouse. (D) Micro-computed tomogram of the inner ear. While *slc26a4* knock-out mice (*mPDS<sup>-/-</sup>*) showed a dilated endolymphatic duct and cochlear hydrops, WT and mouse p.H723R KI homozygote [*mH723R<sup>+/+</sup>*] showed normal cochlea and endolymphatic duct. (E) In the auditory brainstem response, both WT and *mH723R<sup>+/+</sup>* mice showed normal hearing thresholds (n = 13 in each group). ns, not significant.

**Figure S3**

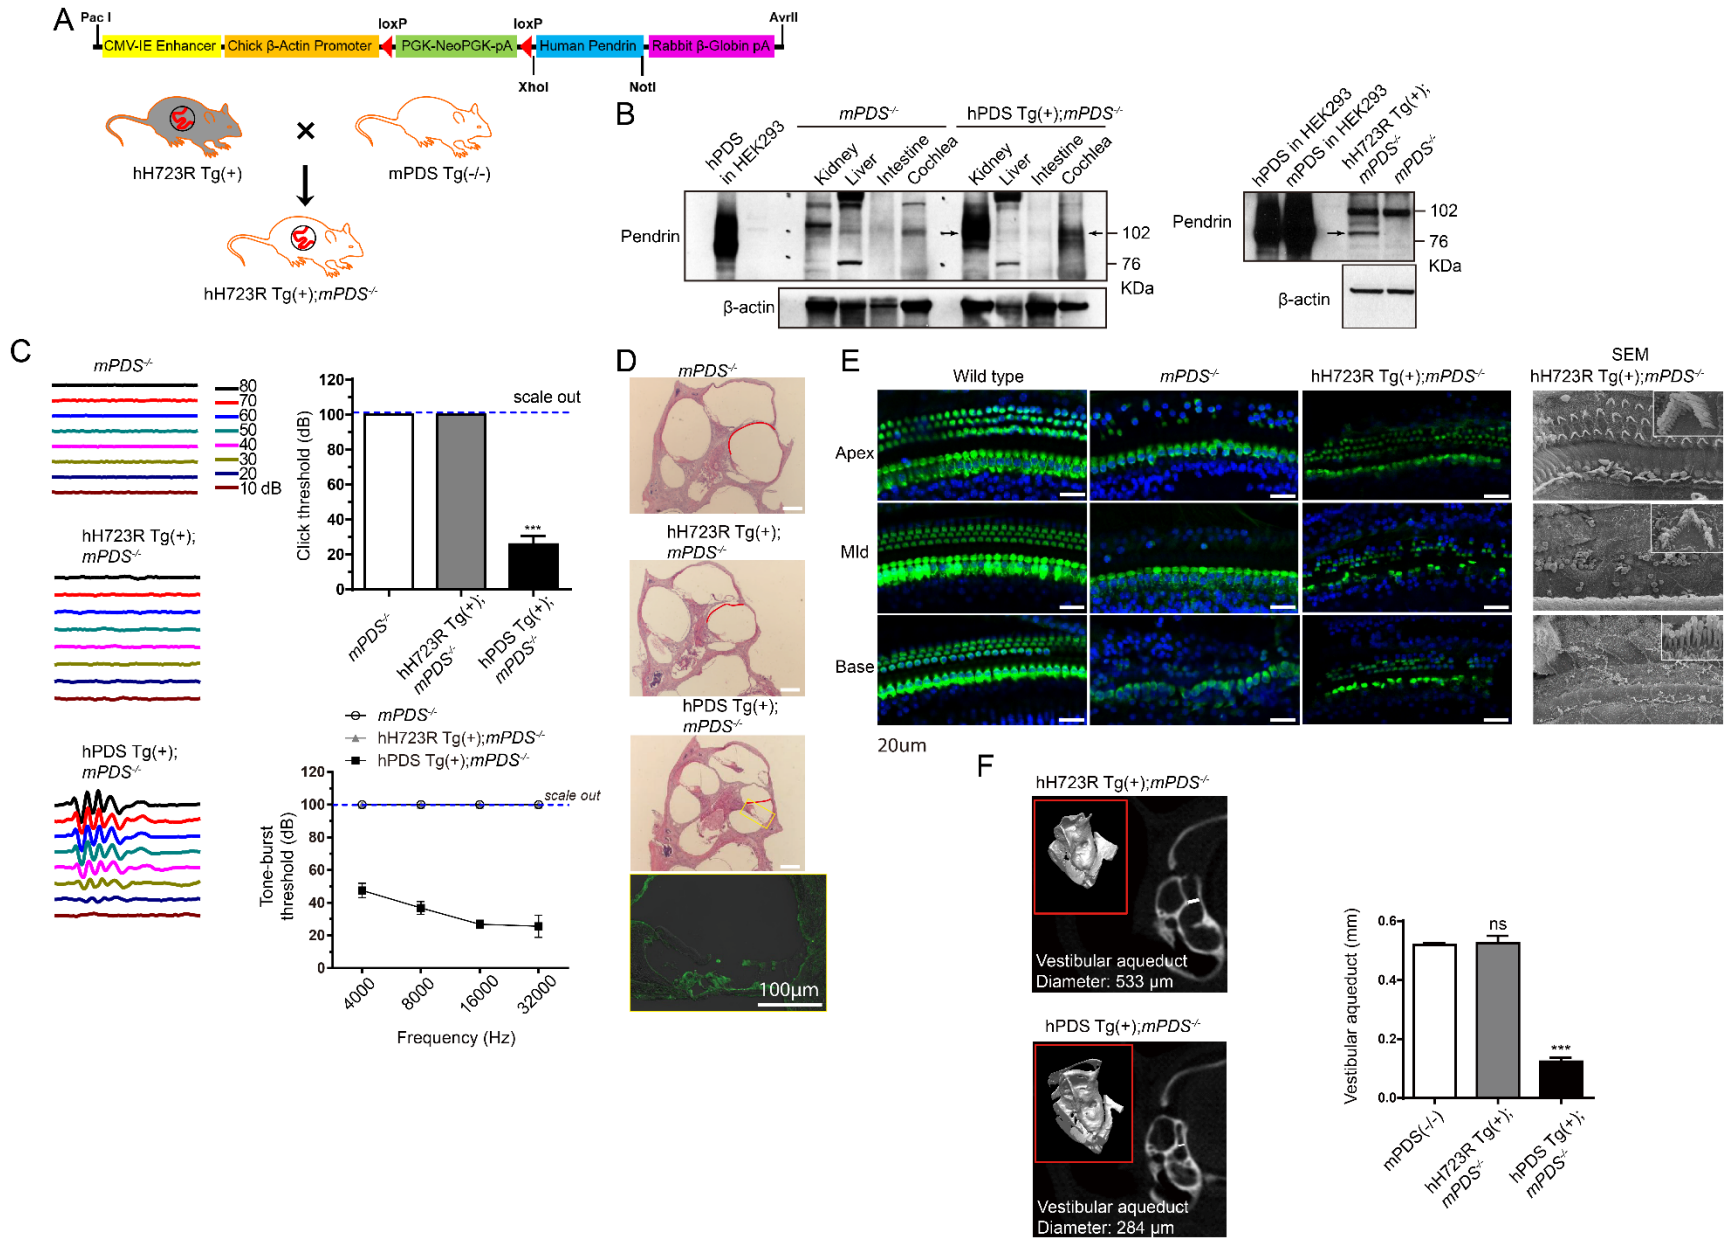

**Figure S3. Generation of a human H723R-pendrin mouse model mimicking deafness in human DFNB4.**

(A) Construct of the human p.H723R *SLC26A4* transgene in the pCB vector backbone. The wild-type (WT) or the p.H723R *SLC26A4* gene is Cre-inducible. The human WT-pendrin (hPDS) and H723R-pendrin (hH723R) transgenic mice [Tg(+)] were crossed with pendrin knock-out [*mPDS*<sup>-/-</sup>] mice to generate hH723R Tg(+);*mPDS*<sup>-/-</sup> mice, in which only ectopic hH723R-pendrin was expressed without expression of mouse pendrin. To induce transgene expression in the inner ear, we crossed this strain with Pax2-Cre mice. (B) When WT- or hH723R-Tg(+) mice were crossed with Pax2-Cre, expression of the *SLC26A4* gene was observed in the inner ear and kidney (black arrows), but not in the other organs. (C) Auditory brainstem response by click and tone-burst stimuli for *mPDS*<sup>-/-</sup>, hH723R(+);*mPDS*<sup>-/-</sup>, and hPDS Tg(+);*mPDS*<sup>-/-</sup> mice. *mPDS*<sup>-/-</sup> and hH723R Tg(+);*mPDS*<sup>-/-</sup> mice were deaf, whereas the hearing function of hPDS Tg(+);*mPDS*<sup>-/-</sup> mice was nearly normalized (n = 8 mice in each group). (D) H&E staining of the inner ear showing that *mPDS*<sup>-/-</sup> and hH723R Tg(+);*mPDS*<sup>-/-</sup> mice had dilatation of the scala media, whereas hPDS Tg(+);*mPDS*<sup>-/-</sup> mice had normal sized scala media without endolymphatic hydrops. Immunostaining of the inner ear (lower panel) showed ectopic pendrin expression (anti-pendrin antibody, green) in the hair cells, supporting cells, inner limbus, lateral wall, and stria vascularis (Pax2-Cre-dependent). Scale bar, 20 μm. (E) Immunofluorescence and surface electron microscopy (SEM) images of the organ of Corti labeled with phalloidin (green) and DAPI (blue) in wild-type, *mPDS*<sup>-/-</sup>, and hH723R Tg(+);*mPDS*<sup>-/-</sup> mice. Note that the outer hair cells showed better survival in hH723R Tg(+);*mPDS*<sup>-/-</sup> than in *mPDS*<sup>-/-</sup> mice. Magnification of electron microscope is x2000 [inset: x30000 (upper and middle), and x35000 (lower)]. Scale bars, 20 μm. (F) Micro-computed tomogram was performed to compare the size of vestibular aqueduct. hH723R Tg(+);*mPDS*<sup>-/-</sup> mice had enlarged vestibular aqueduct, which was comparable to *mPDS*<sup>-/-</sup> mice. In contrast, hPDS Tg(+);*mPDS*<sup>-/-</sup> showed significantly normalized size of vestibular aqueduct when compared to that of *mPDS*<sup>-/-</sup> (n = 6–9 in each group). ns, not significant; \*\*\*, p < 0.001.
